# Supplementary material for: Hidden Costs of Hospital Based Delivery from Two Tertiary Hospitals in Western Nepal
Source: PubMed Central journal article supplement (PMC4911061; doi:10.1371/journal.pone.0157746), 2016-06-16
Supplement: pone.0157746.s001.pdf [file pone.0157746.s001.pdf]

## Questionnaire

“Hidden Cost of Hospital Based Delivery in two Tertiary Hospitals of Western, Nepal”

A. In English language

### Section A

#### Socio-demographic Information

| Q. No | Socio Demographic Characteristics          | Option                               |               |                    | Coding                      | Remark                                        |
|-------|--------------------------------------------|--------------------------------------|---------------|--------------------|-----------------------------|-----------------------------------------------|
| 1.    | Age                                        | .....                                |               |                    |                             |                                               |
| 2.    | Religion                                   | a. Hindu                             |               |                    | 1                           |                                               |
|       |                                            | b. Buddhist                          |               |                    | 2                           |                                               |
|       |                                            | c. Muslim                            |               |                    | 3                           |                                               |
|       |                                            | d. Christian                         |               |                    | 4                           |                                               |
|       |                                            | e. Others<br>(specify).....<br>..... |               |                    | 5                           |                                               |
| 3.    | Education                                  |                                      | <b>Mother</b> | <b>Husband /HH</b> | <b>Tick who are present</b> |                                               |
|       |                                            | Illiterate                           |               |                    | 1                           |                                               |
|       |                                            | Literate                             |               |                    | 2                           |                                               |
|       |                                            | Primary class                        |               |                    | 3                           |                                               |
|       |                                            | Lower secondary                      |               |                    | 4                           |                                               |
|       |                                            | Secondary                            |               |                    | 5                           |                                               |
|       |                                            | Higher secondary                     |               |                    | 6                           |                                               |
| 4.    | What is the monthly income of your family? | .....NRs.                            |               |                    |                             |                                               |
| 5.    | What is your regular work/employment?      |                                      | <b>Mother</b> | <b>Husband /HH</b> |                             | If housewife or unemployed – go to question 6 |
|       |                                            | Unemployed                           |               |                    | 1                           |                                               |
|       |                                            | Government Job                       |               |                    | 2                           |                                               |
|       |                                            |                                      |               |                    | 3                           |                                               |

|  |  |                             |  |  |   |  |
|--|--|-----------------------------|--|--|---|--|
|  |  | Private Job                 |  |  | 4 |  |
|  |  | Farmer/farmers wife         |  |  | 5 |  |
|  |  | Self-employed               |  |  | 6 |  |
|  |  | Housewife                   |  |  | 7 |  |
|  |  | Other (please specify)..... |  |  |   |  |
|  |  | .....                       |  |  |   |  |

**Section B**

**Delivery Related Information**

| <b>Q. No</b> | <b>Delivery Related Characteristics</b>                | <b>Option</b>                                                                                                                                     | <b>Coding</b>         | <b>Go</b> |
|--------------|--------------------------------------------------------|---------------------------------------------------------------------------------------------------------------------------------------------------|-----------------------|-----------|
| 6.           | Which number of pregnancy is it?                       | .....                                                                                                                                             |                       |           |
| 7.           | What type of delivery was it?                          | Normal, vaginal delivery without complication<br>Forceps or vacuum extraction or episiotomy<br>C- section<br>Complication<br>Other (specify)..... | 1<br>2<br>3<br>4<br>5 |           |
| 8.           | What is the distance between your house and hospital?  | .....km.                                                                                                                                          |                       |           |
| 9.           | How long did it take you to reach hospital?            | .....Hours and .....Minutes<br>[.....By Transportation .....By Foot]                                                                              |                       |           |
| 10.          | When are you going to be discharged from the hospital? | .....days after delivery                                                                                                                          |                       |           |

**Section C**

**Maternity Care Expenditure**

**A. Visible Cost**

| S.N | Do you pay for the given items? | Visible Cost                                  | Price in NRs |
|-----|---------------------------------|-----------------------------------------------|--------------|
| 1.  | ....No (0)<br>...Yes (1)        | Medicine purchase from private pharmaceutical | .....NRs     |
| 2.  | ....No (0)<br>...Yes (1)        | Other medical material (Sutures, IV sets etc) | .....NRs     |
| 3.  | ....No (0)<br>...Yes (1)        | Operations                                    | .....NRs     |
| 4.  | ....No (0)<br>...Yes (1)        | Bed price                                     | .....NRs     |
| 5.  | ....No (0)<br>...Yes (1)        | Dressings and bandages                        | .....NRs     |
| 6.  | ....No (0)<br>...Yes (1)        | Needles and syringes                          | .....NRs     |
| 7.  | ....No (0)<br>...Yes (1)        | Blood transfusion                             | .....NRs     |
| 8.  | Others (please specify).....    |                                               | .....NRs     |
|     | Total                           |                                               | /_____/ NRs  |

**B.**

**Hidden Cost**

| S. N. | Items                         | No. of Person | Preliminary Cost | Frequency | Total amount | Remark |
|-------|-------------------------------|---------------|------------------|-----------|--------------|--------|
| 1.    | Transportation                |               |                  |           |              |        |
| 2.    | Food and drink expenses       |               |                  |           |              |        |
| 3.    | Communication                 |               |                  |           |              |        |
| 4.    | Gift to the Staffs            |               |                  |           |              |        |
| 5.    | Laundry                       |               |                  |           |              |        |
| 6.    | Tips                          |               |                  |           |              |        |
| 7.    | Other (specify).....<br>..... |               |                  |           |              |        |

**Thank you very much for your time!**

B. In Nepali Language

खण्ड (क)  
(सामाजिक तथा जनसांख्यिक विवरण)

| प्र.नं | सामाजिक तथा जनसांख्यिक गुण                                       | तह                                                                                                       |         |                    | कोडिङ्ग                        | जाने |
|--------|------------------------------------------------------------------|----------------------------------------------------------------------------------------------------------|---------|--------------------|--------------------------------|------|
| १.     | उमेर (पुरा गरेको वर्ष)                                           | .....                                                                                                    |         |                    |                                |      |
| २.     | धर्म                                                             | क. हिन्दु<br>ख. बौद्ध<br>ग. इस्लाम<br>घ. क्रिश्चियन<br>ङ. अन्य<br>(खुलाउनुहोस्).....                     |         |                    | १<br>२<br>३<br>४<br>५          |      |
| ३.     | शैक्षिक स्थिति                                                   |                                                                                                          | श्रीमति | श्रीमान् वा घरमूलि | वर्तमानमा भएकालाई चिन्न लगाउनु |      |
|        |                                                                  | निरक्षर<br>सारक्षर<br>प्राथमिक विद्यालय<br>निम्न माध्यमिक विद्यालय<br>माध्यमिक विद्यालय<br>उच्च माध्यमिक |         |                    | १<br>२<br>३<br>४<br>५<br>६     |      |
| ४.     | तपाईंको परिवारको मासिक आम्दानी कति हो ?                          | .....ने.रु.                                                                                              |         |                    |                                |      |
| ५.     | तपाईंको घरको मुख्य आम्दानीको स्रोत के हो ? (बहु उत्तर आउन सक्छ ) | सरकारी जागिर<br>गैह्र सरकारी संस्था<br>ब्यापार<br>श्रम<br>कृषि<br>अन्य (खुलाउनुहोस्).....                |         |                    | १<br>२<br>३<br>४<br>५<br>६     |      |

खण्ड (ख)  
(सुत्केरी सम्बन्धि विवरण)

| प्र.नं | सुत्केरी सम्बन्धि गुण                          | तह                                                                                      | कोडिङ्ग                                             | जाने |
|--------|------------------------------------------------|-----------------------------------------------------------------------------------------|-----------------------------------------------------|------|
| ६.     | कतियौ गर्भ थियो यो ?                           | .....                                                                                   |                                                     |      |
| ७.     | कस्तो प्रकारको प्रसुति थियो ?                  | समान्य, खर्तरा मुत्त<br>भ्याकुमले तान्ने<br>अपरेसन<br>खर्तरा<br>अन्य (खुलाउनुहोस्)..... | १<br>२<br>३<br>४<br>५                               |      |
| ८.     | तपाईंको घरबाट<br>हस्पिटलसम्मको दुरी कति छ ?    | .....कि. मि.                                                                            |                                                     |      |
| ९.     | तपाईंलाई हस्पिटल पुग्न कति<br>समय लाग्यो ?     | .....घण्टा.....मिनेट<br>सवारी साधनबाट.....पैदलबाट.....                                  | जूनबाट<br>तिनीहरु<br>पुगे त्यसमा<br>चिन्न<br>लगाउनु |      |
| १०.    | हस्पिटलबाट कति दिनमा<br>डिस्चार्ज हुनु हुन्छ ? | .....दिन सुत्केरी भएपछि                                                                 |                                                     |      |

### खण्ड (ग)

### सुत्केरी स्याहार खर्च

#### (क) देख्न सक्ने खर्च

| क्र.सं. | के खर्च गर्नुभयो ?                 | देख्न सक्ने खर्च                           | ने.रु. |
|---------|------------------------------------|--------------------------------------------|--------|
| (१)     | गरिएन (०) .....<br>गरियो (१) ..... | औषधि बाहिरको मेडिकल<br>पसलबाट किनेको       | .....  |
| (२)     | गरिएन (०) .....<br>गरियो (१) ..... | अन्य मेडिकल सामान (सुचर,<br>आइ.वि.सेट आदि) | .....  |
| (३)     | गरिएन (०) .....<br>गरियो (१) ..... | अप्रेसन                                    | .....  |
| (४)     | गरिएन (०) .....<br>गरियो (१) ..... | बेड चार्ज                                  | .....  |
| (५)     | गरिएन (०) .....<br>गरियो (१) ..... | ड्रेसिङ्ग                                  | .....  |
| (६)     | गरिएन (०) .....<br>गरियो (१) ..... | सुई                                        | .....  |
| (७)     | गरिएन (०) .....<br>गरियो (१) ..... | रगत लिने                                   | .....  |
| (८)     | अन्य (खुलाउनुहोस्).....            |                                            | .....  |

|       |            |
|-------|------------|
| जम्मा | ने.रु..... |
|-------|------------|

(ख) अदृश्य खर्च

| क्र.सं. | किसिम                      | कति<br>जनालाई | प्रारम्भिक<br>खर्च | कति चोटी | एकमुष्ठ<br>रकम | कैफियत |
|---------|----------------------------|---------------|--------------------|----------|----------------|--------|
| (१)     | सवारी साधन                 |               |                    |          |                |        |
| (२)     | खाना खर्च                  |               |                    |          |                |        |
| (३)     | सूचना संचार खर्च           |               |                    |          |                |        |
| (४)     | कर्मचारीलाई चिनो           |               |                    |          |                |        |
| (५)     | कपडाको सरसफाई              |               |                    |          |                |        |
| (६)     | बक्स/टिप्स                 |               |                    |          |                |        |
| (७)     | अन्य (खुलाउनुहोस)<br>..... |               |                    |          |                |        |
